# Supplementary material for: The revision of the 2014 European tobacco products directive: an analysis of the tobacco industry's attempts to ‘break the health silo’
Source: HighWire-hosted journal article supplement (doi:10.1136/tobaccocontrol-2014-051919), 2015-02-24
Supplement: tobaccocontrol-2014-051919supp_appendix2.pdf [file tobaccocontrol-2014-051919supp_appendix2.pdf]

## Appendix 2 Associations and private companies involved in the campaign against stricter measures in the TPD

| Associations and (non-TTC) companies that lobbied EU policy makers to oppose stronger TPD measures (either via correspondence, meetings, working groups, statements and petitions) | Geography      | Sources                                                     |
|------------------------------------------------------------------------------------------------------------------------------------------------------------------------------------|----------------|-------------------------------------------------------------|
| <b>BUSINESS AND TRADE ASSOCIATIONS</b>                                                                                                                                             |                |                                                             |
| ACC (association of Communication Companies)                                                                                                                                       | Belgium        | 1049                                                        |
| Acotex (Sociedad Cooperativa Ult Grado)                                                                                                                                            | Spain          | 1049                                                        |
| AČRA (Asociace Českých reklamních agentur a marketingové komunikace)                                                                                                               | Czech Republic | 1049                                                        |
| AFUBRA (Associação dos Fumicultores do Brasil)                                                                                                                                     | Brazil         | 1049                                                        |
| ALEC (American Legislative Exchange Council)                                                                                                                                       | US             | 1049                                                        |
| AMCHAM EU (American Chamber of Commerce)                                                                                                                                           | US             | PMI, 1049                                                   |
| AMCHAM Germany                                                                                                                                                                     | Germany        | 1049                                                        |
| AMCHAM Italy                                                                                                                                                                       | Italy          | 1049                                                        |
| ANCMMER (Asociația Națională a Comercianților Mici și Mijlocii din România)                                                                                                        | Romania        | 1049                                                        |
| APRAM (Association des Praticiens du Droit des Marques et des Modèles)                                                                                                             | International  | Media, 1049                                                 |
| ASAJA (Asociación Agraria Jóvenes Agricultores)                                                                                                                                    | Spain          | 1049                                                        |
| ASINCA (Asociacion Industrial de Canarias)                                                                                                                                         | Spain          | 1049                                                        |
| Association des Commerçants en Gros des Produits de Tabac du Piree                                                                                                                 | Greece         | 1049                                                        |
| Association of Independent Newsagents in Wallonia and Brussels                                                                                                                     | Belgium        | 1049                                                        |
| Association of tobacco kiosks and retailers of Athens                                                                                                                              | Greece         | 1049                                                        |
| BASCAP (Business Action to Stop Counterfeiting and Piracy)                                                                                                                         | International  | Minutes, Parliamentary reports                              |
| BDI (Bundesverband der Deutschen Industrie)                                                                                                                                        | Germany        | 1049*                                                       |
| BdZ (Bundesverband der Zigarrenindustrie)                                                                                                                                          | Germany        | Commission report, 1049                                     |
| BLL ( Bund der Lebensmittelrecht)                                                                                                                                                  | Germany        | 1049                                                        |
| BMM (Beneluxvereniging voor merken and modellenrecht)                                                                                                                              | Benelux        | Media, 1049                                                 |
| BTWE (German National Federation of Tobacco Retailers)                                                                                                                             | Germany        | Media, 1049                                                 |
| Burley Tobacco Growers Cooperative Association Lexington                                                                                                                           | US             | 1049                                                        |
| BusinessEurope                                                                                                                                                                     | EU             | PMI, Minutes, 1049, Parliamentary report                    |
| CCCI (Cyprus Chamber of Commerce and Industry)                                                                                                                                     | Cyprus         | 1049                                                        |
| CCOO (Comisiones Obreras de Canarias)                                                                                                                                              | Spain          | 1049                                                        |
| CEBRE (Czech Business Representation to the EU in Brussels)                                                                                                                        | Czech Republic | 1049*                                                       |
| CECCM (Confederation of European Community Cigarette Manufacturers)                                                                                                                | EU             | Minutes, Commission & Parliamentary reports, 1049           |
| CEOE (Confederación Española de Organizaciones Empresariales)                                                                                                                      | Spain          | 1049                                                        |
| CEDT (Confédération Européenne des Détaillants en Tabac)                                                                                                                           | EU             | PMI, Media, 1049, Minutes, Parliamentary report, NGO report |
| CEPYME (Confederación Española de la Pequeña y Mediana Empresa)                                                                                                                    | Spain          | 1049                                                        |
| CLC (Commerce Transport Services)                                                                                                                                                  | Luxembourg     | 1049                                                        |
| Coalition for fine paper industry                                                                                                                                                  | EU             | 1049                                                        |
| Confédération des Buralistes de France                                                                                                                                             | France         | 1049                                                        |
| Confederazione Nazionale Coldiretti                                                                                                                                                | Italy          | 1049                                                        |
| Confindustria (Confederazione Generale dell'Industria Italiana)                                                                                                                    | Italy          | 1049                                                        |
| CGPME (Confederation Generale des Petites et Moyenne Entreprises)                                                                                                                  | France         | 1049                                                        |
| Copa (Cogeca)                                                                                                                                                                      | EU             | PMI, Minutes                                                |
| CSNA (Convenient Stores and Newsagents Association)                                                                                                                                | Ireland        | 1049                                                        |
| DI (Confederation of Danish Industry)                                                                                                                                              | Denmark        | 1049*                                                       |
| Dom Polski Wschodniej w Brukseli (East Poland House)                                                                                                                               | Poland         | 1049                                                        |
| DVAI (Deutscher Verband der Aromenindustrie e. V.)                                                                                                                                 | Germany        | Minutes                                                     |
| EACA (European Association of Communications Agencies)                                                                                                                             | EU             | 1049, Parliamentary report                                  |

|                                                                           |               |                                                               |
|---------------------------------------------------------------------------|---------------|---------------------------------------------------------------|
| ECAT (Emergency Committee for American Trade)                             | US            | 1049                                                          |
| ECITA (Electronic Cigarette Industry Trade Association)                   | UK            | Minutes, Parliamentary reports, NGO report                    |
| ECMA (European Cigar Manufacturers Associations)                          | EU            | Minutes, 1049, Commission report, Legacy                      |
| ECMA (European Carton Makers Association)                                 | EU            | Parliamentary reports, Minutes, 1049                          |
| ECTA (European Communities Trade Mark Association)                        | EU            | PMI Parliamentary report, media, 1049                         |
| EFFA (European Flavour Association)                                       | EU            | Minutes, 1049                                                 |
| EFFAT (European Federation of Food, Agriculture and Tourism Trade Unions) | EU            | PMI, Minutes, 1049                                            |
| EMMA (European Magazine Media Association)                                | EU            | Minutes, 1049                                                 |
| ERA (European Rotogravure Association)                                    | EU            | Minutes                                                       |
| ERPA (European Rolling Paper Association)                                 | EU            | Minutes                                                       |
| ESTA (European Smoking Tobacco Association)                               | EU            | Minutes, 1049                                                 |
| ESTOC (European Smokeless Tobacco Council)                                | EU            | PMI, Minutes, Commission & Parliamentary reports, 1049, media |
| ETRC (European Travel Retail Confederation)                               | EU            | Minutes                                                       |
| ETV (European Tobacco Wholesalers Association)                            | EU            | Parliamentary report, Minutes                                 |
| FB (American Farm Bureau Federation)                                      | US            | 1049                                                          |
| FEB-VBO (Federation of Enterprises in Belgium)                            | Belgium       | 1049*                                                         |
| Federation of Professional Renter Kiosks and Tobacconists of Greece       | Greece        | 1049                                                          |
| FEDIL (Business Federation Luxembourg)                                    | Luxembourg    | 1049                                                          |
| FEDMA (Federation of European Direct and Interactive Marketing)           | EU            | Parliamentary report                                          |
| FETRATAB (European Federation of Tobacco Processors)                      | EU            | PMI, Minutes, 1049                                            |
| FIT (Federazione Italiana Tabaccai)                                       | Italy         | NGO report, 1049                                              |
| FNCT (Federacion Nacional de Cultivadores de Tabaco)                      | Spain         | 1049                                                          |
| FRANCE TABAC (Union de Sociétés Coopératives Agricoles)                   | France        | 1049                                                          |
| FWD (Federation of Wholesale Distributors)                                | UK            | Media                                                         |
| Forest (UK Smoker's Rights Group)                                         | UK            | Minutes, Parliamentary report, blogs, website, media          |
| GAMA (Global Acetate Manufacturers' Association)                          | US            | PMI, Parliamentary reports, Minutes, 1049                     |
| GITES (Groupement des Industriels Européens du Tabac)                     | EU            | Minutes                                                       |
| GRUR (German Association for the Protection of Intellectual Property)     | Germany       | 1049                                                          |
| IBEC (Irish Business and Employers confederation)                         | Ireland       | 1049*                                                         |
| ICC (International Chamber of Commerce)                                   | International | Parliamentary report                                          |
| ICC Lithuania                                                             | Lithuania     | 1049                                                          |
| IPA (Institute of Practitioners in Advertising)                           | UK            | 1049                                                          |
| IPH Krakowie (Izba Przemysłowo-Handlowa w Krakowie)                       | Poland        | 1049                                                          |
| ITGA (International Tobacco Growers Association)                          | International | Media, NGO report, 1049                                       |
| IV (Vereinigung der österreichischen Industrie-Industriellenvereinigung)  | Austria       | 1049                                                          |
| KH (Komitet Handlu Krajowej Izbie Gospodarczej)                           | Poland        | 1049                                                          |
| KIG (Krajowa Izba Gospodarcza)                                            | Poland        | 1049                                                          |
| KPH (Kongregacja Przemysłowo-Handlowa)                                    | Poland        | 1049                                                          |
| KSPT (Krajowe Stowarzyszenie Przemysłu Tytoniowego)                       | Poland        | Parliamentary report                                          |
| LPK (Lithuanian Confederation of Industrialists)                          | Lithuania     | 1049*                                                         |
| MADOSZ (Magyar Dohánytermelők Országos Szövetsége)                        | Hungary       | NGO report, media, 1049                                       |
| MARQUES (The European Association of Trade Mark Owners)                   | EU            | PMI, media, 1049                                              |
| Medef (Mouvement des Entreprises de France)                               | France        | 1049                                                          |
| Mesa del Tabaco                                                           | Spain         | 1049                                                          |
| NAM (National Association of Manufacturers)                               | US            | 1049                                                          |
| NAT-2010 (National Tobacco Growers Association)                           | Bulgaria      | Parliamentary report                                          |
| National Brand Association                                                | Unknown       | 1049                                                          |
| NBL (Naerbutikkernes Landsforening)                                       | Denmark       | 1049                                                          |
| NDM (Näringslivets Delegation för Marknadsrätt)                           | Sweden        | 1049                                                          |
| NFRN (National Federation of Retail Newsagents)                           | UK            | Media, 1049                                                   |

|                                                                                       |                |                                                             |
|---------------------------------------------------------------------------------------|----------------|-------------------------------------------------------------|
| NFTC (National Foreign Trade Council)                                                 | US             | 1049                                                        |
| NRZHIU (Naczelna Rada Zrzeszeń Handlu i Usług)                                        | Poland         | 1049                                                        |
| NSO (Brancheorganisatie voor de tabaksdetailhandel)                                   | Netherlands    | 1049                                                        |
| NSZZ Solidarność                                                                      | Poland         | 1049                                                        |
| NTRG (Nordic Travel Retail Group)                                                     | Scandinavia    | Minutes                                                     |
| OITAB (Organización Interprofesional del Tabaco de España)                            | Spain          | 1049                                                        |
| Organizatia Profesionala Pe Filiera de Tutun                                          | Romania        | 1049                                                        |
| PIH (Polska Izba Handlu)                                                              | Poland         | Parliamentary reports, Minutes, 1049                        |
| POHID (Polska Organizacja Handlu i Dystrybucji)                                       | Poland         | 1049                                                        |
| Polish Confederation Lewiatan                                                         | Poland         | Parliamentary report, 1049                                  |
| Polish tobacco farmers association                                                    | Poland         | Parliamentary report                                        |
| Prodipresse (Association of Independent Newsagents in Wallonia and Brussels)          | Belgium        | 1049                                                        |
| PZPT (Polski Związek Plantatorów Tytoniu)                                             | Poland         | 1049                                                        |
| SEEHT (Greek Electronic Cigarette Trade Association)                                  | Greece         | Parliamentary report, Minutes                               |
| SEV (ΣΕΒ σύνδεσμος επιχειρήσεων και βιομηχανιών)                                      | Greece         | 1049*                                                       |
| SNIAA (Syndicat National des Industries Aromatiques Alimentaires)                     | France         | Parliamentary reports, Minutes                              |
| SSI (Stichting Sigarettenindustrie)                                                   | Netherlands    | Legacy                                                      |
| Swedish Food Federation                                                               | Sweden         | Minutes                                                     |
| Swedish National Association for Convenience Stores and Fast Food                     | Sweden         | 1049                                                        |
| Swedish Trade Federation (Svensk Handel)                                              | Sweden         | Minutes                                                     |
| Svenskt Näringsliv                                                                    | Sweden         | 1049*                                                       |
| Tabacos de Cáceres cooperative                                                        | Spain          | 1049                                                        |
| TABD (Transatlantic Business Dialogue)                                                | International  | 1049                                                        |
| TAMA (Tobacco Association of Malawi)                                                  | Malawi         | 1049                                                        |
| TGANC (Tobacco Growers Association of North Carolina)                                 | US             | 1049                                                        |
| TVECA (Tobacco Vapor Electronic Cigarette Association)                                | EU             | Minutes, Parliamentary report                               |
| UK Packaging Industry Group                                                           | UK             | Media                                                       |
| Unión de Asociaciones de Estanqueros de Espana                                        | Spain          | 1049                                                        |
| UNION-IP (Association of European Practitioners in Intellectual Property)             | EU             | Media                                                       |
| UNITAB (European Tobacco Growers Association)                                         | EU             | PMI, Parliamentary report, Minutes, 1049, NGO report, media |
| UNITAB Italia                                                                         | Italy          | 1049                                                        |
| Unite                                                                                 | UK             | Parliamentary reports                                       |
| USCIB (US Council for International Business)                                         | US             | 1049                                                        |
| VCPO (Austrian Retailers Association)                                                 | Austria        | Media, 1049                                                 |
| VdR (Verband der deutschen Rauchtobakindustrie e. V)                                  | Germany        | 1049                                                        |
| VDZ (Verband der Deutschen Zeitschriftenverleger)                                     | Germany        | Minutes, 1049                                               |
| VEA (Vereniging van communicatieadviesbureaus)                                        | Netherlands    | 1049                                                        |
| VFP (Vlaamse Federatie voor persverkopers)                                            | Belgium        | 1049                                                        |
| VNK (Vereniging Nederlandse Kerftobakindustrie)                                       | Netherlands    | Legacy                                                      |
| VNO-NCW (Confederation of Netherlands Industry and Employers)                         | Netherlands    | 1049*, Legacy                                               |
| VNS (Nederlandse Vereniging voor de Sigarenindustrie)                                 | Netherlands    | Legacy                                                      |
| WKO                                                                                   | Austria        | 1049                                                        |
| ZAW (Zentralverband der Deutschen Werbewirtschaft)                                    | Germany        | 1049                                                        |
| ZO NOS PPP (Independent Trade Union of Workers in the Food Industry and Allied Trade) | Czech Republic | 1049                                                        |
| ZZPPT (Federacja Związków Zawodowych Pracowników Przemysłu Tytoniowego w Polsce)      | Poland         | 1049                                                        |
| <b>COMPANIES</b>                                                                      |                |                                                             |
| Addkeshaw Goddard LLP                                                                 | UK             | Parliamentary report                                        |
| Amcor                                                                                 | Australia      | 1049                                                        |
| Arnold & Porter LLP                                                                   | US             | 1049                                                        |
| Bell Pottinger                                                                        | UK             | 1049                                                        |
| Blakemore Wholesale                                                                   | UK             | Media                                                       |
| Cadwalader, Wickersham & Taft LLP                                                     | US             | 1049                                                        |
| C&I (Communications & Institutions)                                                   | France         | 1049                                                        |

|                                      |               |                             |
|--------------------------------------|---------------|-----------------------------|
| Clifford Chance                      | France        | Commission report, 1049     |
| Cross Media PR                       | Poland        | 1049                        |
| DCI                                  | International | Minutes                     |
| Delfortgroup                         | Austria       | 1049                        |
| Deltafina                            | Italy         | 1049                        |
| Deutsche Benkert GmbH & Co KG        | Germany       | Parliamentary report, 1049  |
| Hogarth Chambers                     | UK            | 1049                        |
| Hume Brophy                          | International | Parliamentary reports       |
| IME (Institute for Market Economics) | Bulgaria      | 1049                        |
| Interel European Affairs             | Belgium       | Parliamentary reports       |
| Kreab Gavin Anderson                 | Belgium       | Parliament report, 1049     |
| Luther Pendragon Brussels            | Belgium       | NGO report                  |
| MANE                                 | France        | PMI, Parliament report      |
| Mayr-Melnhof Group                   | Austria       | 1049                        |
| Media Intelligence Partners          | UK            | Parliament report           |
| MMM (Medien Marketing Meinsen)       | Germany       | 1049                        |
| MR Business Services                 | UK            | Parliament report           |
| Monopolverwaltung GmbH               | Austria       | 1049                        |
| Pappas & Associates                  | Belgium       | NGO report, 1049            |
| Paynes Security                      | UK            | Parliamentary report        |
| SAT Tabacos de Talayuele             | Spain         | 1049                        |
| SWM                                  | US            | 1049                        |
| The European House Ambrosetti        | Italy         | 1049                        |
| THN Ltd                              | UK            | Parliament report           |
| Weidenhammer Packaging Group         | Germany       | Minutes, Parliament reports |
| World Wide Tobacco España            | Spain         | 1049                        |
| Work Services SA                     | Poland        | 1049                        |

Note: Excluded from the analysis are health advocates, pharmaceutical associations/companies, and e-cigarette associations/companies with no apparent links with the tobacco industry.
